# Supplementary material
Source: Springer Nature journal article supplement (https://www.springermedizin.de/resource/supplementary/12889_2009_2656_MOESM1_ESM.pdf/9486930)

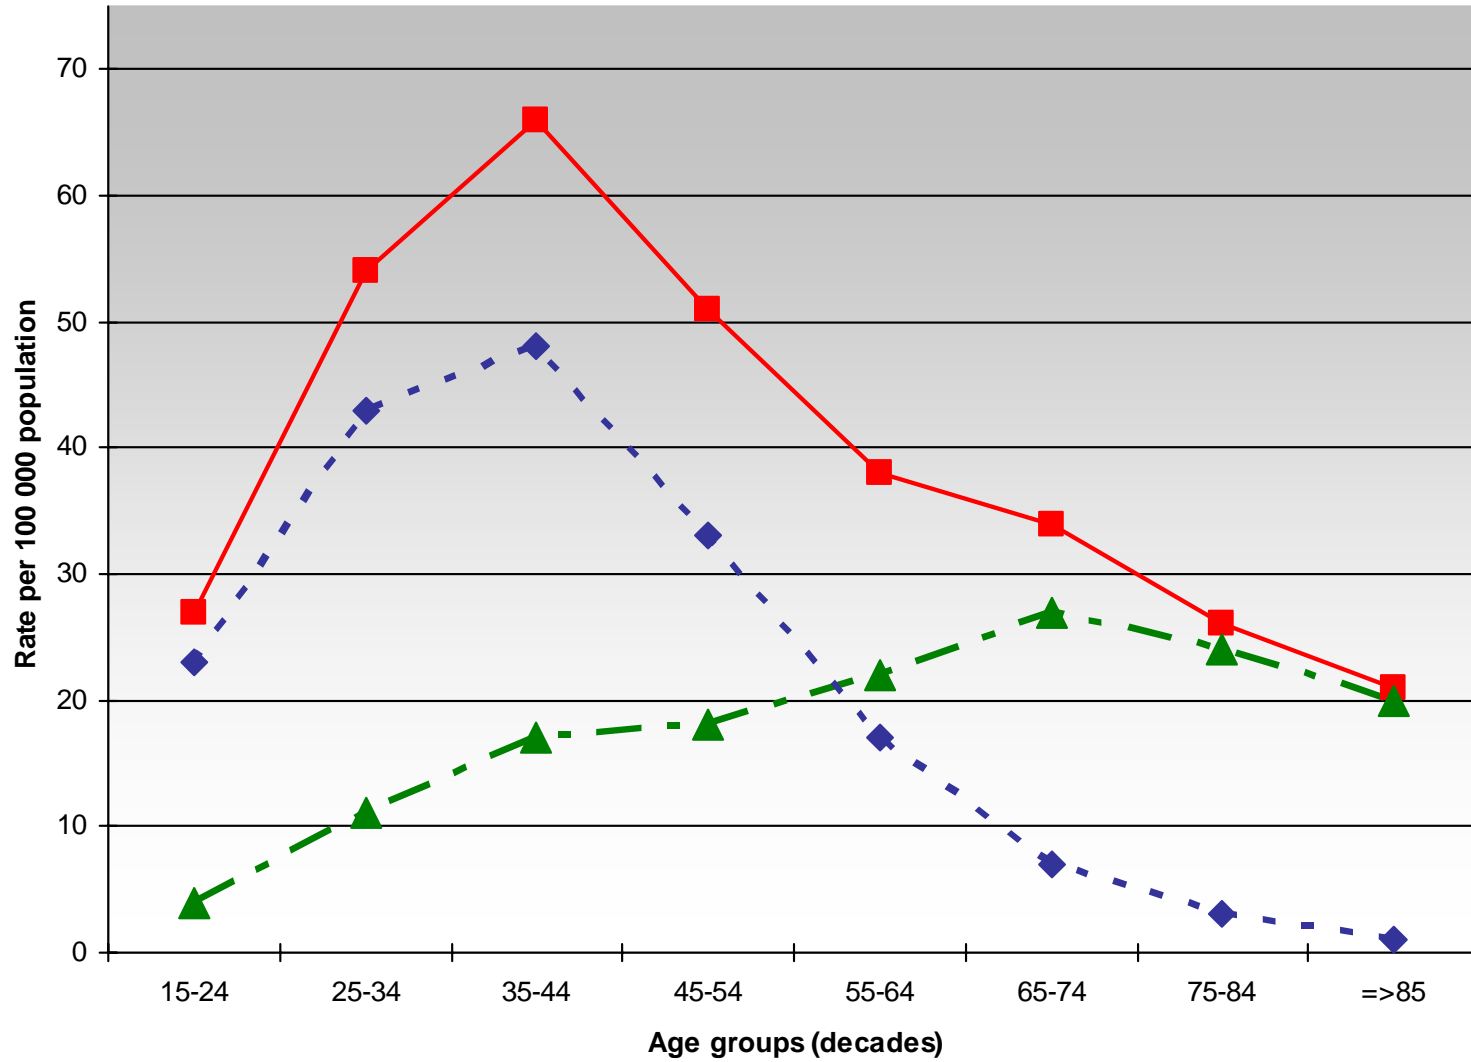

Supplement: MOESM1 [file 9486930]
